# Supplementary material for: Limitations of 2-pool models in representing different time-scale dynamics of particulate and mineral-associated organic carbon
Source: Copernicus journal article supplement (doi:10.5194/egusphere-2026-747), 2026-02-18
Supplement: Supplementary file 1 [file egusphere-2026-747-supplement.pdf]

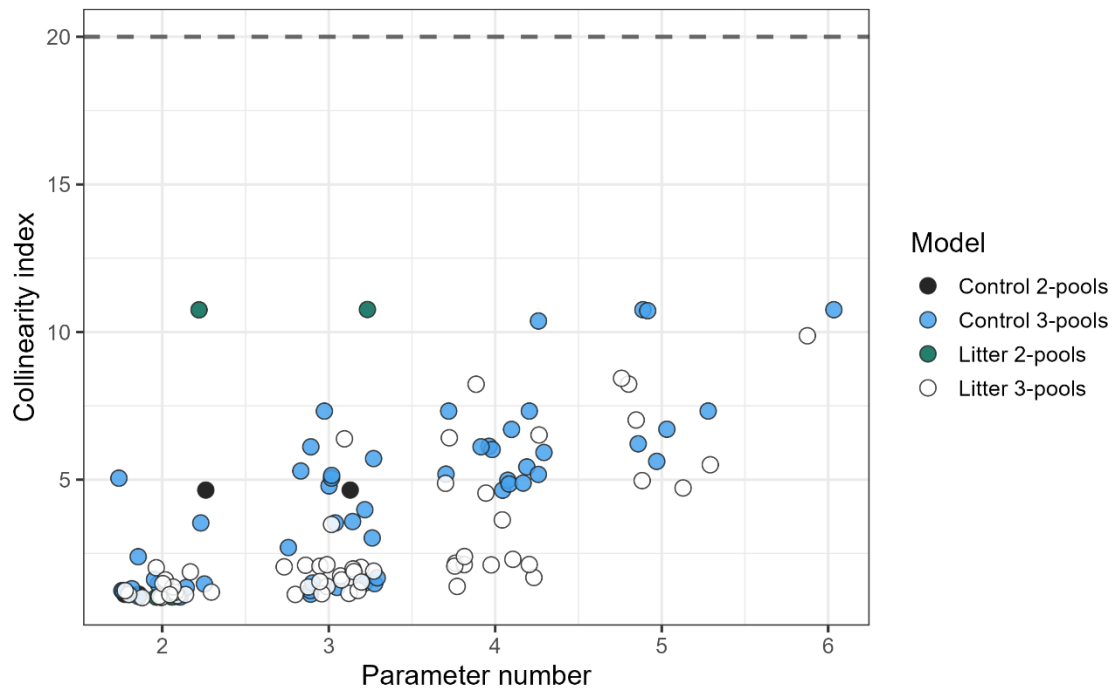

**Supplementary Fig. 1:** Collinearity index as a function of the number of parameters estimated by the different models. The dashed line indicates the upper limit for acceptable collinearity. All estimated collinearity indices were below 20 across models.
